# Supplementary material for: Sensory Evaluation of Rabbit Meat from Individuals Fed Functional and More Sustainable Diets Enriched with Freshwater Cladophora glomerata Macroalgal Biomass
Source: MDPI journal article supplement (doi:10.3390/ani13132179), 2023-07-03
Supplement: s1 [file s1]

**Table S1.** Ingredients in rabbit feed and chemical composition of a standard compound diet and diets supplemented with different dosages of *C. glomerata* biomass (52–122 days old).

| Ingredient (%) <sup>1,2</sup> | Diet <sup>3</sup> |       |       |
|-------------------------------|-------------------|-------|-------|
|                               | SCD               | CG4   | CG8   |
| Corn                          | 3.00              | 3.13  | 3.44  |
| Barley                        | 18.00             | 18.00 | 18.00 |
| Oats                          | 25.00             | 25.00 | 25.00 |
| Sunflower meal                | 13.22             | 11.97 | 9.97  |
| Linseed meal                  | 1.00              | 1.00  | 1.00  |
| Soy meal                      | 3.72              | 3.00  | 3.00  |
| Vegetable oil                 | 1.00              | 1.00  | 1.00  |
| Beer east                     | 2.00              | 2.00  | 2.00  |
| Hay                           | 29.26             | 27.10 | 24.79 |
| <i>C. glomerata</i>           | –                 | 4.00  | 8.00  |
| Antimycotoxin                 | 0.30              | 0.30  | 0.30  |
| Vitamin-mineral premix        | 3.50              | 3.50  | 3.50  |
| Total                         | 100               | 100   | 100   |
| Chemical composition (%)      |                   |       |       |
| DE (MJ/kg)                    | 10.49             | 11.13 | 12.16 |
| Crude protein                 | 17.54             | 17.53 | 17.54 |
| Crude fibre                   | 13.56             | 14.39 | 15.05 |
| Ash                           | 10.03             | 10.37 | 10.31 |
| Ether extract                 | 3.12              | 3.20  | 3.10  |
| NDF                           | 32.49             | 34.19 | 35.89 |
| ADF                           | 19.71             | 20.12 | 20.73 |
| ADL                           | 4.89              | 4.94  | 5.15  |

Note: <sup>1</sup> Vitamin and mineral premix (per kg of feed): vitamin A 10.08 TV, vitamin D<sub>3</sub> 1.14 TV, vitamin E 50.30 mg, vitamin K<sub>3</sub> 0.99 mg, vitamin B<sub>1</sub> 3.71 mg, vitamin B<sub>2</sub> 2.80 mg, vitamin B<sub>5</sub> 9.80 mg, vitamin B<sub>12</sub> 0.01 mg, nicotinic acid 20.40 mg, folic acid 0.22 mg, choline chloride 170.00 mg, Mg 76.28 mg, Fe 317.00 mg, Zn 110.89 mg, Cu 19.16 mg, Co 0.29 mg, I 0.67 mg, Se 0.31 mg. <sup>2</sup> DE, diet energy; NDF, neutral detergent fibre; ADF, acid detergent fibre; ADL, acid detergent lignin. <sup>3</sup> SCD, standard compound diet; CG4, standard compound diet + 4% *C. glomerata* biomass; CG8, standard compound diet + 8% *C. glomerata* biomass.
